# Supplementary material
Source: publisher site journal article supplement (doi:10.18632/aging.205620)
Supplement: Supplementary file 1 [file aging-v16-205620-supplementary-material-SD1.pdf]

## SUPPLEMENTARY FIGURES

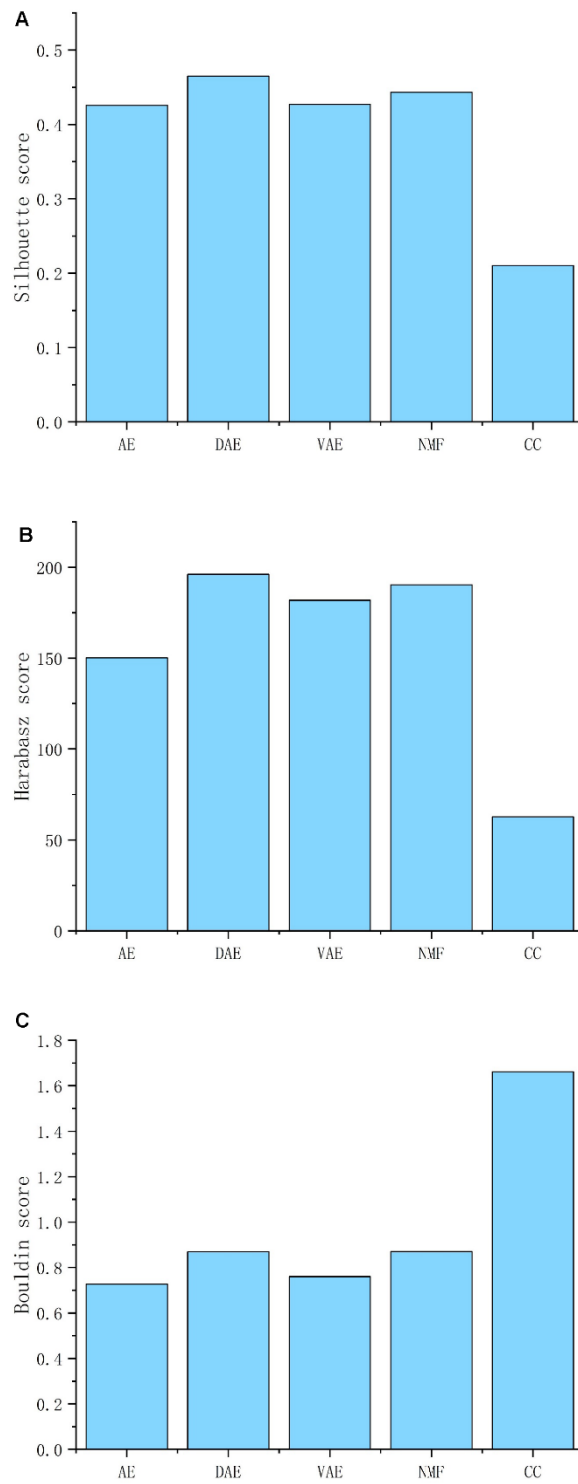

**Supplementary Figure 1. t-sne results for AE, DAE, VAE, NMF, and CC when the number of clusters is 2. (A–C) are silhouette, harabasz, and bouldin scores of these algorithms, respectively.**

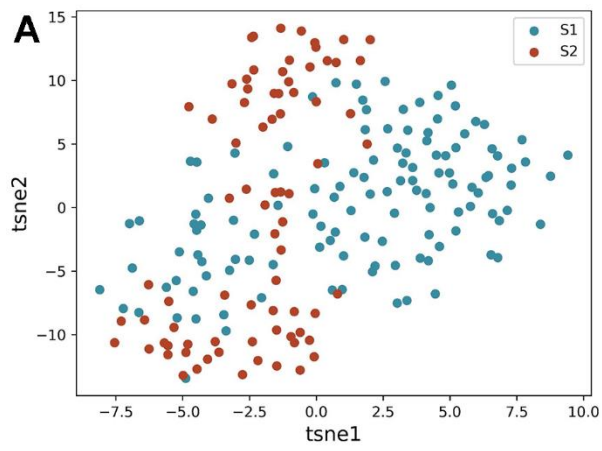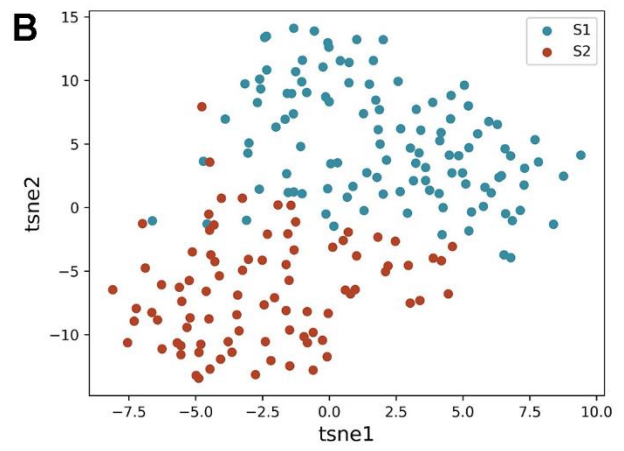

**Supplementary Figure 2.** t-sne results of NMF and CC when the number of clusters is 2. (A, B) are t-sne scatter plots of NMF and CC, respectively.
