# Supplementary material
Source: publisher site journal article supplement (doi:10.18632/aging.205620)
Supplement: Supplementary file 1 [file aging-v16-205620-supplementary-material-SD2.xlsx]

## Sheet: Sheet 1
Supplementary Table 1. Intersection_case.
Only ICDRGs	Only DEGs	ICDRGs AND DEGs
BAX	SMOC2	ATG5
CALR	FNDC1	CASP1
CASP8	IL1RL1	CD8A
CD4	FRZB	CD8B
CXCR3	SFRP4	ENTPD1
EIF2AK3	AL031283.2	IFNGR1
FOXP3	FREM1	IL10
HMGB1	SEZ6L	IL17RA
HSP90AA1	CD163	IL1R1
IFNA1	RNASE2	MYD88
IFNB1	AC015845.2	NT5E
IFNG	ITIH5	PRF1
IL17A	SCUBE2	TLR4
IL1B	MARK3	TNF
IL6	ST6GALNAC3
LY96	EXT1
NLRP3	LUM
P2RX7	MYH6
PDIA3	MATN2
PIK3CA	MFAP4
	SSC5D
	COL22A1
	ASPN
	AL049839.2
	PPP3CC
	VSIG4
	TUBA3E
	BLM
	NPTX2
	PRMT2
	CYS1
	AOX1
	SIGLEC9
	FCN3
	TUBA3D
	CCDC144NL-AS1
	APCDD1L
	C1QTNF7
	SLCO4A1
	PHLDA1
	PENK
	MXRA5
	GALNT15
	LEFTY2
	C1QTNF2
	TLL2
	OLFML1
	ARHGAP1
	S1PR3
	LINC02137
	LCN10
	SCARA3
	PTN
	HTRA1
	POM121L9P
	WNK3
	LAMP5
	TUBA3C
	LCN6
	GNMT
	NTM
	AZIN2
	FKBP5
	FCER1A
	CYP4Z1
	NRK
	TMTC1
	CHDH
	LYVE1
	UBA7
	JAM3
	OLAH
	LPCAT3
	VGLL4
	LSP1
	SCN2B
	TSPAN9
	SLC1A7
	SYT17
	KCND3
	PPEF1
	INKA2
	KIAA1755
	SLC16A9
	IL18R1
	BOC
	DPYSL3
	PTGFRN
	AK5
	PPP2R2B
	ARMS2
	GLT8D2
	ATP1B2
	AQP10
	APLNR
	CRISPLD1
	OGN
	CRYM
	C6orf106
	AC010327.3
	ADGRA2
	TIMP2
	IL15RA
	HMGN2
	BCL6
	CYP4B1
	CHAC2
	MAGED2
	RASL11B
	TDRD9
	ESR1
	ZDHHC3
	SULT1B1
	DIO2
	HMGN1
	CD38
	LRRC17
	MELTF-AS1
	PROM1
	USP11
	COL14A1
	LINC02593
	ACE
	ADGRD1
	ISLR
	IL17RB
	SLC31A2
	IL1R2
	CALCOCO2
	LINC00900
	AC002546.1
	STEAP3
	PRRT2
	PATZ1
	PQLC2L
	CTSK
	GZMH
	COL16A1
	C8orf88
	OXER1
	PLXDC1
	SLC36A4
	PLIN2
	CPM
	UNC80
	CAPN5
	DMC1
	NMRAL2P
	AQP3
	RTL3
	CCDC3
	BCL2L1
	GNA14
	AC040173.1
	AEBP1
	JAM2
	OVCH1
	CD83
	CYP11A1
	NRIP2
	NFIA-AS2
	AMD1
	PCNT
	ORMDL3
	PI16
	GLOD4
	NECTIN1
	COL9A1
	Z97192.2
	NID1
	USP22
	IFI44L
	RARRES1
	COL15A1
	AIF1L
	HBB
	ALOX15B
	CD59
	KCNN3
	SCGN
	MANCR
	IL17D
	TMIGD3
	MDK
	HAAO
	SEMA5B
	BCL2L13
	CHPT1
	DPT
	GDF6
	CCND1
	SLC11A1
	KCNIP1
	OASL
	SYN2
	COLGALT2
	LYPD1
	SPAAR
	MX1
	C2orf40
	SGPP2
	HAPLN1
	PTP4A2
	RGS4
	DTX4
	ADAMTS9
	CRHBP
	ALOX5
	IL34
	PPL
	SSTR2
	SAMHD1
	EVC
	CASP17P
	LINC02006
	MLX
	FAM102A
	AC005699.1
	ARMC4
	ADAMTS4
	LINC00670
	ANO1
	CHRNA3
	ITGAL
	CREB5
	SOCS2-AS1
	STRBP
	XAF1
	CD27-AS1
	EFCC1
	PDE5A
	COL8A2
	BID
	MORN4
	EDNRB
	ZNF365
	SMO
	LINC00377
	RDH10-AS1
	KIAA1549
	PI15
	TPO
	STAMBPL1
	FMOD
	PRKAG3
	C1orf105
	PCYOX1L
	GRB14
	HOOK1
	CATSPERB
	KCNS3
	DUOX1
	GSTM5
	ANTXR1
	CFTR
	LAD1
	PODXL2
	AL157895.1
	HSH2D
	LAMA4
	OGDHL
	RYR3
	AL109615.3
	HERC5
	CD109
	LINC00964
	KCNC4
	AL365181.3
	AC009041.2
	DBH-AS1
	TENM4
	SLC2A1
	ABCG2
	SLC25A18
	CCND2
	SLC16A2
	SAMD3
	CX3CR1
	OPN3
	PLA2G2A
	SARDH
	ANKRD34C
	CYP2J2
	STAC2
	MSS51
	SULF1
	CD1C
	HMOX2
	METTL7B
	SNAP47
	BACH2
	CAPN6
	C10orf25
	LTBP3
	PAQR5
	SOX8
	HNRNPCP3
	MAP6
	WDR66
	KCNK1
	LCN15
	C11orf80
	EVL
	CPAMD8
	GZMA
	APBB3
	AL008726.1
	SHISA2
	GDNF-AS1
	CPXM2
	RNF144B
	HOPX
	MYH10
	C16orf89
	NKG7
	MOXD1
	PPP1R26-AS1
	PAFAH2
	SLC31A1
	SARM1
	GLI2
	SPPL2A
	CCDC69
	SLC25A45
	EPHX2
	STAT4
	COL10A1
	GPX3
	ART3
	RAB37
	AKTIP
	DERA
	MCEMP1
	ADAMTS15
	ATP1A4
	LGI3
	CFAP77
	HRK
	LRRC55
	ZNF682
	ANPEP
	SNCAIP
	GLIS1
	GUCD1
	MEF2C-AS1
	TNMD
	USP31
	FAM78B
	USP51
	NRXN2
	CMA1
	PPP1CC
	BTN3A1
	TPRKB
	LINC01134
	MIR100HG
	RPS6KA2
	SLC2A9
	MGST1
	CCDC113
	AQP4
	PNMA1
	LTBP2
	GZMB
	SERPINE2
	FAM180B
	TMEM30B
	MEG3
	NSG1
	GPSM2
	HTATIP2
	TSPAN14
	ALDH1A2
	RPGR
	MATN3
	GLUL
	AQP7P1
	AC096921.2
	LINC02028
	ETNK2
	MRC2
	FAM107A
	PDE4C
	TMEM200B
	CXCL10
	SHISA3
	HMGN2P5
	TFCP2L1
	TGFB2-AS1
	NHSL1
	FAP
	LRRC77P
	PALLD
	PODN
	PPP1R10
	ATP1B1
	ZMYND15
	RNF41
	LINC00861
	BCL6B
	ITGB7
	AL445222.1
	P3H2
	TMEM231
	BRSK1
	TMED4
	ODC1
	SERPINB8
	FGF1
	CCNG1
	EHD4-AS1
	NLGN3
	WNT9A
	DELE1
	PLCE1
	HNRNPA1P66
	AMOT
	SOCS2
	ACKR4
	IL2RB
	AL050343.1
	SSR3
	KAZALD1
	RTP4
	FBLN7
	SERPINA5
	NQO1
	DYNC2LI1
	ASB18
	SYTL2
	PJA1
	SPC24
	PTDSS1
	ANXA3
	THBS4
	KCNB1
	HLA-DPB1
	PLBD1
	TGFBR3
	CLU
	LINC02289
	MX2
	MARVELD2
	CD247
	PRDX6
	MBD2
	HLA-DPA1
	TBC1D29
	AGTR2
	CRY2
	ELK1
	FCGR3A
	PCED1B
	C1QTNF3
	KIAA1211
	NTF3
	SLC26A11
	MBP
	ANP32A
	RXRG
	CTSW
	RGS11
	TMEM119
	LINC02207
	RHBDL3
	AL590999.1
	AC006273.1
	AL445426.1
	OPCML
	NREP
	EP300-AS1
	GPR4
	HIVEP3
	ECM2
	SERPINA3
	CTSG
	TSPY26P
	LINC01088
	ZNF135
	PREX1
	SLC52A3
	ETV4
	C5orf64
	AL355297.4
	SIGLEC17P
	CRISPLD2
	RHNO1
	GPRASP2
	LINC01563
	GMNC
	FYN
	ZFYVE21
	DEGS1
	ITGA9-AS1
	TLR2
	MGC16275
	VPS13D
	KCMF1
	MCM10
	TMEM178B
	ADGRF5
	CARNS1
	WNT9B
	NDP
	AC025423.4
	MTURN
	SLC36A1
	CX3CL1
	FATE1
	HBA2
	C19orf12
	SLC25A13
	TMEM70
	GAL3ST4
	C16orf58
	NHLRC1
	TERF2IP
	SLAMF7
	AC064875.1
	PRXL2A
	SLCO2A1
	MPP3
	AP3M2
	CCDC80
	NYNRIN
	ADAMTS14
	NES
	TIMP4
	OSMR
	NAMPT
	C1orf162
	TRAF3IP3
	RNF157
	NUDT4
	PACS1
	UAP1
	INKA2-AS1
	ARHGAP22
	HDC
	SLC1A1
	ITGBL1
	PVR
	TMEM132B
	HBA1
	MNS1
	CADPS2
	C11orf65
	AMT
	TMEM98
	GNB3
	RASEF
	ZMYND12
	AC103808.6
	SYN3
	COL9A2
	UBB
	SMTNL2
	LIPH
	ZNF423
	RARG
	GFOD1
	AC009113.1
	NFYB
	EIF2D
	CFAP20
	JAK1
	LIN7A
	WASF1
	HEMK1
	LINC01116
	GFRA3
	CD74
	FMN1
	FGF10
	LINC01105
	AC024940.1
	GARNL3
	ESM1
	AL161908.1
	PSME4
	KLHDC8A
	JAML
	CD3E
	SERPINI1
	ZDHHC9
	ASRGL1
	CTH
	AC112250.2
	FAM83F
	DUSP15
	AC092683.1
	XG
	GATM
	OAS1
	ADH1B
	CHD5
	ZAP70
	INTS3
	MN1
	CREG2
	TLCD2
	ATP1A1
	ASCC1
	MFSD6
	MFSD1
	GGH
	CTF1
	VIT
	MYOC
	TSPAN11
	CLSTN1
	AL591845.1
	CHRAC1
	SDSL
	SFRP1
	FANCI
	CBS
	TBC1D1
	AP003119.3
	HPSE
	F8
	KLHL41
	NPPA
	KCNA5
	OSBPL11
	ADAM19
	LRRN4CL
	AL353751.1
	PRSS35
	IGSF22
	SLC6A1
	CNTN3
	LCN12
	AP005329.3
	IFIT3
	UBN1
	ZNF337
	C5orf56
	OAS2
	SSUH2
	AC010136.1
	ACTG1P17
	GPR68
	PART1
	CCR1
	AC012085.2
	DRC3
	PRR5L
	FCGR3B
	NUDT5
	PIK3IP1
	SYT11
	FAM220A
	MTMR9LP
	ETNPPL
	KIF5C
	COPS7B
	MKS1
	STAT3
	TBX3
	FZD1
	PCOLCE2
	MYOT
	PIK3CB
	NIFK-AS1
	GLYATL2
	RSAD2
	CA14
	AC025857.2
	EGLN1
	FLRT2
	TCEAL7
	CCDC115
	AGTR1
	FAM155B
	TMEM192
	TIMP3
	TESPA1
	AC131902.2
	CD177
	PID1
	AC108471.2
	PLCD4
	PMP22
	EFS
	POLA2
	SIGLEC7
	PLEKHH2
	HYLS1
	FZD10-DT
	TENT5B
	TXNRD1
	FBLN1
	CDC42EP4
	FZD7
	MID1
	FAM161B
	UBA6-AS1
	AC107294.2
	ESRP2
	ANKRD29
	EI24
	PLA2G4F
	ST7
	HIF3A
	STON2
	ARMC8
	DESI1
	BCAT1
	FERMT1
	TCF24
	TMEM71
	COLQ
	GRAP2
	GADD45A
	WEE1
	DNAJC27-AS1
	TGFB2
	CERCAM
	LINC00908
	LEF1
	AL133338.1
	C19orf66
	MKRN2OS
	ZBP1
	DCAKD
	C1QTNF9
	IRX6
	SERPINF2
	HLA-DMB
	SLC7A8
	GPRASP1
	AC114316.1
	TFPI
	POT1-AS1
	PDE2A
	BMP4
	DACT1
	AL161668.4
	TEAD2
	PCCB
	IFIT2
	NGLY1
	AC009955.2
	AC026691.1
	SIGLEC10
	AC062029.1
	CYP4F3
	TMEM130
	IQSEC3
	CD3D
	CUL7
	ANKMY2
	ADAMTS5
	KIAA0040
	LGR6
	PARVA
	SEMA4B
	APOA1
	AC137723.1
	FGR
	TCEAL5
	CNST
	COL1A2
	SDR16C5
	CD6
	AC136475.5
	CCT2
	ARMCX2
	OAZ2
	COQ8A
	MOCS1
	KLRB1
	PTCH2
	CD2
	SPACA9
	LTB
	KPNA2
	LINC01128
	LINC00174
	TIFA
	FBXO17
	RCC1
	ELL2
	CYB5R1
	REELD1
	KLF10
	LIG1
	DEPTOR
	GAB3
	ST3GAL6
	POLE2
	FMO5
	APCDD1L-DT
	MAP2K6
	SYTL4
	ADAMTSL1
	DHX58
	ZSCAN18
	CNIH3
	RACGAP1
	BEND5
	TC2N
	NAP1L3
	GPR84
	KIRREL3
	ZNF436-AS1
	SAMD11
	LCK
	MERTK
	PPP1R15A
	FZD5
	TBX21
	THBS3
	C10orf71-AS1
	DNAAF3
	R3HDM2
	CXCL11
	ZNF69
	ZBTB4
	SLC5A1
	GSDMB
	CENPA
	SLC9A7
	SLC22A16
	SH3BP2
	PAAF1
	STEAP4
	INSYN1
	GPRC5A
	STX1B
	TMEM178A
	TPK1
	SGCE
	PTPRA
	LINC02447
	NAPSB
	PRRG4
	HHAT
	CRABP2
	SNORA59A
	KNG1
	SNCA
	IVD
	BPI
	C15orf65
	EDN1
	CDRT1
	COL12A1
	CDH23
	DEPDC1B
	ITGB2-AS1
	TRDC
	PITPNC1
	TRMT61B
	ARHGAP33
	P3H3
	PCDH1
	LILRA6
	DOK5
	PTK7
	TRIM45
	LTBP4
	NCOA3
	STOX1
	TMEFF2
	SH2D1B
	PLA2G12A
	SLC7A11
	PLCXD3
	UBE2L6
	NUP62CL
	SLC39A11
	PDE11A
	CDH26
	AC015712.2
	LINC00672
	SLCO4C1
	RAD1
	LRRC15
	ALOX5AP
	ARMC9
	CCDC74A
	AL365181.2
	F13A1
	GJD3
	KCNK17
	PGAM1P5
	SMIM9
	AC006441.4
	GTF2IRD1
	FPR1
	LINC00968
	LINC02308
	SHE
	CTHRC1
	PCSK1
	AC107294.3
	UBE2H
	SERTAD4
	PHKA2
	ZBTB16
	PAPSS2
	TTLL3
	KCNK3
	45175
	ZDHHC14
	TP63
	BTN3A2
	ZFP90
	TRO
	P2RX6
	PPM1L
	AC105053.1
	STAC
	BRD7
	MAPKAP1
	AGBL5
	AGER
	NCEH1
	SHMT1
	ADCY3
	DHRS1
	MAPK10
	STX16
	SLIT2
	MME
	ZNF821
	METTL21EP
	SLA
	MT-TK
	BPGM
	LBP
	GRB7
	TSPAN10
	SLIT3
	SDC3
	DCHS1
	POLR1E
	ZBTB7B
	DAG1
	SPATA6L
	UCHL1
	TPST2
	AC080013.4
	CHST14
	ARRDC4
	GNLY
	CDC45
	FCRL3
	LINC01166
	SLC39A1
	HLA-DOA
	ARMH3
	MCFD2
	TM6SF2
	ATP2A2
	SYNPO2L
	COL21A1
	PAPLN
	PHF21B
	CPQ
	AC099792.1
	ARHGAP26
	LINC00342
	PLXNB1
	MXRA8
	GRIK4
	LRRC10
	HMCN2
	AC063919.1
	TET2-AS1
	AL132780.2
	SKAP1
	PRPH
	LINC00211
	AL591379.1
	TMEM183A
	KIF13A
	COG7
	MIR181A2HG
	SERTM1
	LINC00501
	DNAJC22
	PLA2G4C
	AP004247.2
	EREG
	S1PR5
	MMP25-AS1
	ASNSD1
	GAP43
	HYI
	ST3GAL1
	RAET1E
	OMG
	FCN1
	AC073862.1
	CLEC7A
	HS6ST2
	FCER1G
	COL1A1
	RHAG
	CERS1
	DERL1
	EIF4EBP2
	REM1
	MTRF1L
	BGN
	ELMO1
	LINC01852
	DPEP2
	LHFPL6
	MTFR1
	CCDC168
	MAOA
	MEI4
	VPS35L
	IGSF10
	LPIN1
	GATA2-AS1
	MAP2K1
	PIGH
	TNRC6C-AS1
	BBS12
	AC004147.4
	PCNX2
	SCO1
	HYAL4
	TUBB4A
	HPCAL4
	PLEKHH1
	LUCAT1
	CC2D2A
	CD48
	NANP
	C12orf75
	LDHA
	AAAS
	FAM181B
	TIGAR
	IFI44
	DALRD3
	NAMPTP1
	HLA-DRA
	ATP8B5P
	FBXL16
	MAP4
	IFT43
	MRPL3
	EGR2
	CACNA2D4
	AC011611.4
	BPHL
	STAB2
	ABCB1
	LINC00899
	APOBEC3G
	IER3
	SHQ1
	LRRC8E
	BAIAP2-DT
	FBXL2
	CACNA1E
	CYYR1
	ATP6V0E2-AS1
	RASGRP1
	CIRBP
	AC010980.2
	AL590560.1
	KLHL32
	QSOX1
	SUN2
	ZMPSTE24
	TGFBR2
	NBPF1
	C7orf31
	ADPRH
	DENND2A
	ZBTB12
	AQP7P4
	HADHB
	NME8
	SLC38A2
	GLI1
	AC012313.3
	PALM3
	AP006545.1
	KYNU
	DCLK2
	B3GALT1
	PPIP5K2
	NDN
	ST8SIA2
	EML2
	TRPC4
	DDX58
	SIDT1
	FAM110B
	HAR1A
	TANC2
	ACAD10
	BX537318.1
	MAP3K8
	MCAM
	TMEM8B
	PTPRN2
	SNX7
	APLP1
	PRRG3
	DNAH8
	LARP1B
	HSPA14
	PPTC7
	COL8A1
	PRRX1
	MSR1
	CYP46A1
	SRPK1
	XPC
	AURKA
	TMEM165
	AC036108.3
	SPTAN1
	MARVELD1
	DNAJC16
	CPE
	TMEM245
	AC009269.4
	ASIC1
	HSF2
	WTIP
	PMS2P4
	HTR2A
	ABHD6
	WWP1
	LINC02427
	HMGN2P3
	FSCN1
	NOP14-AS1
	TSPAN13
	LINC02005
	SLC7A7
	TTLL6
	BMP7
	MED12L
	COLEC11
	MFHAS1
	SNTG2
	SCAMP5
	AL445250.1
	DUOX2
	AC131902.1
	AL161935.3
	ATP1B3
	RERE
	CEBPG
	ZNF706
	REV1
	OCRL
	AC026471.2
	PRXL2C
	BTN3A3
	CHL1
	PAMR1
	THY1
	AC093278.2
	ANKRD24
	SYT13
	NTNG2
	CEP55
	H2AFZ
	GPR183
	MYOZ1
	CDCP1
	BLOC1S1-RDH5
	MTHFD2
	PYROXD2
	REPS2
	SP110
	MMP2
	CERS6
	TBC1D10C
	DOK4
	GRIP1
	IL13RA1
	AC004130.1
	TRMT9B
	TSPAN32
	LY9
	ACSS3
	DPH3
	PARD3
	SMYD1
	FBLIM1
	ARHGEF2
	WDR76
	RABGAP1L
	MIR99AHG
	SLC22A5
	AGFG1
	MOB3B
	TMEM200A
	ARMC12
	KIF24
	DYRK1B
	GREB1L
	KIF21B
	RETSAT
	OLMALINC
	ORC1
	SCN4B
	TMEM44-AS1
	CAVIN1
	MLIP
	ROR2
	GCLM
	POGLUT1
	AC078880.3
	SIRPB2
	FCHSD1
	DLEU1
	AMHR2
	HPGDS
	C1orf112
	RXRB
	TLR7
	KLHDC9
	LINC01011
	ADAM18
	GRIN2C
	AC090229.1
	MEOX2
	LRMDA
	GFPT2
	OSBPL7
	AC092667.1
	FCRL6
	NFYC
	AC091948.1
	ST6GALNAC1
	MCM2
	EPB41L4B
	CLMN
	ABHD1
	GABARAPL2
	LINC00484
	RNF168
	SFTA1P
	ZNF480
	CD3G
	HLA-J
	RTL9
	CXCL12
	TNFRSF25
	EMILIN3
	AL158211.1
	TMEM132C
	CTPS1
	LNX1
	AASS
	HIST1H2BJ
	ABHD15
	RNF165
	ALPL
	LINC00893
	SAMSN1
	MAFK
	AP4B1
	LINC00632
	BFSP1
	ABHD11
	CLEC11A
	AMZ2P1
	AC138356.1
	MEDAG
	VPS26C
	RHPN2
	TMX4
	TIGIT
	NRP2
	AC025171.4
	GABRD
	RBM47
	HLA-DQA1
	MIR3142HG
	HCLS1
	ADAMTSL2
	MADD
	ACR
	INO80E
	AC097639.1
	GATA6
	TRGC2
	ATP6V1G2
	HOXB-AS1
	KCTD2
	CBLB
	ACP1
	AC136475.9
	AC026471.1
	EXOC3L4
	PRODH
	SNTB1
	PPARG
	TK2
	AL096865.1
	TMEM173
	HMGB2
	FLT4
	NPC1
	CMTM8
	C4orf54
	SELL
	MANEAL
	AC005865.1
	ALDH18A1
	CD53
	FHAD1
	TPM1-AS
	KLF9
	SEC14L2
	NFIL3
	F2RL2
	GDPD3
	AC011815.1
	HLA-DMA
	HEPH
	TRIM17
	EPN2
	AL049648.1
	LINC01844
	HK3
	ANKRD2
	ADAMTSL5
	GATA2
	MIOS
	ACPP
	NIPA2
	RGR
	LINC00482
	TMED5
	AC007743.1
	SPTSSA
	DNM1
	DLGAP1
	MEIS1
	NAAA
	ATP6AP1L
	BEX1
	PRPF3
	TRIM37
	HSPA2
	ZNF536
	MT-TP
	CAMKK2
	ST8SIA1
	THBS2
	DDAH2
	FGGY
	HERC6
	IL20RA
	KCNIP2
	CDH16
	C2orf88
	PPM1M
	GPCPD1
	STRADB
	AK9
	FXYD6
	NLRC3
	ABCC2
	SRARP
	CARD16
	TMEM131L
	LINC01684
	MEOX1
	BEAN1
	SYTL1
	FLVCR2
	TNNI1
	TRGC1
	MAP3K7CL
	MBL1P
	GIMAP7
	ECE2
	LPP-AS2
	KLF15
	SNHG28
	FAM160A2
	POT1
	TCN2
	EXOC7
	ANKH
	AC106865.1
	RGS17
	MIR1-1HG-AS1
	AC010201.1
	FGF5
	WNT10B
	CA3
	EPS15L1
	AL845321.1
	RGL3
	PHYHD1
	LOXL1
	GPR82
	AMN1
	PLPP5
	CHTOP
	TMEM42
	CHUK
	MAGED1
	GEMIN8P4
	RIMS4
	NUP210
	TCEAL1
	AC095055.1
	GPR83
	CBY1
	CCDC191
	ISCU
	ZC3H12B
	AC114316.2
	TANGO2
	P2RY13
	CD300LG
	ENO2
	SVEP1
	OLFML2A
	GPD1L
	ME1
	AC005534.1
	LRRC1
	ATRNL1
	KCNS2
	DLGAP4
	EAF2
	DUSP27
	FAM225B
	B9D1
	PTPRG
	ZFYVE28
	P2RX1
	RIMKLB
	CCDC125
	FAM241B
	LMX1B
	GSR
	TRAK1
	CAMKMT
	DTX3
	HAS2
	COL5A1
	TTLL1
	TRMT2B
	ANKRD7
	CCDC8
	SLC6A4
	SLC29A2
	PDSS1
	TMEM38B
	ZNF496
	NRN1
	TFEC
	GATC
	RGS9BP
	TADA2B
	BST1
	EHMT2
	SCG5
	SPN
	CSDC2
	NOD2
	AC137932.2
	MS4A4A
	GPATCH4
	CARD6
	SOX15
	CHEK1
	ROBO3
	C1RL
	SLC39A14
	HCG20
	FARP1
	RIPOR3
	CARD11
	ZSCAN26
	MRO
	TTPAL
	RBM17
	PSME3
	TARS2
	AC022034.1
	SBK3
	IL17RD
	MIR22HG
	DOCK9
	CCR7
	NEK11
	ITGA11
	UBASH3A
	AKR1C1
	LINC02084
	DHRS7C
	INKA1
	CARD8-AS1
	QPCT
	LINC01160
	ZNF385C
	AKAP8
	EFNA5
	NGF
	GPA33
	RAMP2
	GDNF
	PTK2B
	MCHR1
	LINC00906
	TRIM16L
	ASPA
	PDZD4
	LAPTM5
	ARHGAP31
	MYO7A
	B3GNT9
	SCRG1
	GBP4
	ZFYVE27
	TMEM80
	ANKDD1B
	PKNOX1
	AP000911.1
	AGRN
	PRIMA1
	GTF2IP20
	ZNF853
	DAAM2
	C1orf54
	ASB16-AS1
	NPPB
	TSEN2
	TMEM206
	TNFRSF11A
	AC136777.1
	LFNG
	CLCN5
	ITGA5
	LPAR5
	EEF1A1P31
	KIT
	MYL1
	CUX1
	AC008105.3
	AC244021.1
	CHST9
	AC104794.2
	WWC1
	XK
	PNMA8B
	SELENOI
	KLC4
	SPNS3
	AP005264.1
	C22orf46
	AF165147.1
	GPR173
	AL139094.1
	LINC01426
	RUNDC3B
	WNT5A
	LINC01554
	COMP
	ADD3-AS1
	CDYL2
	MPIG6B
	SRGN
	N6AMT1
	AL162171.1
	GALNT5
	CGNL1
	TMEM19
	FLT3
	AC092687.3
	CPO
	CILP
	GABRE
	DNER
	SLC9A6
	TTC9
	AC104046.1
	LRRC8A
	DNAJC14
	STRAP
	TNNT3
	AC010501.1
	CABLES1
	MASP1
	TNNT1
	HOGA1
	UBAC2
	HLA-DRB1
	LRP8
	TFCP2
	PTPRU
	MON1B
	LINC02502
	KCNH4
	LINC00844
	TTC23
	LYPD5
	FCER2
	VIPAS39
	S100A9
	LHCGR
	LACTB
	CXCL9
	CEACAM3
	STARD5
	AC103770.1
	DENND3
	45177
	PPP1R13B
	HSD17B14
	MTMR10
	NCKAP1L
	EFCAB1
	IL6R
	MT-TW
	GPAT2
	ENPP4
	ARL2BP
	AL137779.2
	SERTAD4-AS1
	ABCB6
	WLS
	PDCL3P4
	PCDH12
	TMEM107
	GATA6-AS1
	FAM166B
	CR1
	FMO1
	RPN1
	CD5
	NFKB2
	MSANTD3
	SMARCAL1
	STX2
	NLRC5
	HS6ST1
	STMN1
	EMC3
	ZNF552
	PTGDR2
	MST1R
	TMEM62
	AC108474.1
	CDK4
	FEZF1-AS1
	ACACB
	SLC16A12
	MAN1C1
	ARHGEF25
	HESX1
	VEGFC
	GPR12
	PBX2
	AL137847.2
	CD244
	SLC15A2
	CRADD
	NACA
	AGTPBP1
	ACBD4
	KHDRBS1
	ICOSLG
	OLFML3
	C8orf31
	FMNL3
	PDIA2
	TCF21
	PDE1A
	EIF4EBP1
	SCGB1D2
	AC107959.1
	KLRD1
	VRK2
	SHLD3
	ZFP82
	ARID5A
	PAQR6
	VASH1
	DNASE1
	MMP16
	TEX41
	BMS1P4
	LRGUK
	SPRTN
	CACNA2D3
	IRAK3
	EDA
	VILL
	FBXO24
	CHRDL1
	AL391684.1
	OSBP2
	RANBP6
	CMTM2
	RNASEH1
	AC097461.1
	ST3GAL5
	FOXS1
	PIK3R5
	PYHIN1
	AC016769.3
	UTP15
	PLLP
	TM9SF1
	ARHGAP15
	AC011461.1
	PAQR7
	RBM4B
	CIAO2A
	PIM1
	MT1X
	KCNJ4
	DIRC2
	PTP4A2P2
	SNHG3
	GLRX3
	PIWIL4
	SCNN1A
	AL359504.2
	CDK2
	SMG6
	ANXA4
	ZNF512
	KLHL2
	CNIH4
	AL358472.2
	IL2RG
	SIT1
	MS4A1
	EMB
	SMYD5
	SLC38A8
	RRN3P3
	S100A3
	NAGK
	KCNMB2
	SMPD3
	C1orf43
	MTIF2
	AC096677.1
	SLC37A1
	LSS
	WDR20
	NRG1
	ANOS1
	PODXL
	DNA2
	TMEM156
	AL356489.2
	GFI1B
	SH2D1A
	CLSPN
	SLC5A6
	PRKRA
	POLQ
	LYRM9
	ZNF251
	MIR497HG
	PPA1
	WASF4P
	GDPD1
	HHIPL1
	AL441992.1
	LMAN1L
	KDM2B
	CD163L1
	BZW1
	NSMCE2
	HMGCS2
	ITGAX
	ID2-AS1
	ING4
	SLC30A10
	FGF7
	LINC02388
	STARD7
	F3
	ECT2
	RPL17
	ARAP3
	VAT1L
	MSI1
	CD3EAP
	SLC19A2
	PIK3R3
	GCOM1
	SF1
	NFE2L3
	AHCY
	STMN3
	OSBPL2
	BRINP1
	CBWD2
	KCNJ1
	ZSCAN16
	ATG16L2
	MTERF3
	SAT1
	GABPB2
	CDKN3
	GCKR
	C20orf197
	PRKAR2A
	PARVB
	AC107027.3
	COPZ2
	AC027130.1
	CCDC68
	CCL24
	LMX1A
	CNOT8
	DCUN1D3
	CD1E
	AC105001.1
	UNC5B
	NAA50
	MCF2L2
	FANCL
	IPO11
	PPDPF
	NLRC4
	AC022075.1
	RAB9A
	SNORD101
	ABCC1
	AC090673.1
	PLS1
	AL359881.1
	TANK
	TENT5C
	DGKI
	CATSPERG
	CDH6
	GPR27
	SLC1A3
	GPN3
	SDC2
	CNPY4
	SYTL5
	CERS5
	GSPT1
	ASPRV1
	ELAVL3
	PDLIM1
	EMC7
	FGF14
	TRIM14
	CCDC74B
	KNSTRN
	VPS8
	TGM2
	TUBAL3
	FN3KRP
	MELK
	MARCO
	TRAF1
	AMZ2
	NEURL1
	DEFB124
	HNRNPA1L2
	IVNS1ABP
	ARSK
	AC125807.2
	TK1
	NOCT
	VSTM2L
	DBP
	TOM1L2
	SLC35F1
	C17orf107
	WARS2-IT1
	TMED10P2
	SPARCL1
	MEFV
	FGD2
	SLFN13
	LINC01985
	ENC1
	MAP3K6
	SEMA4C
	KSR1
	AL138762.1
	HK2
	STK38
	ZNF143
	TRAF3
	CACNA1G
	TPT1-AS1
	NDC80
	LINC00486
	UNG
	C6orf48
	PXDNL
	C6orf120
	MYL12A
	ZDHHC13
	MTCH1
	CLEC4F
	LRRC49
	IGFN1
	IFI6
	GLA
	AL590666.2
	GOLGA3
	OPN4
	IGSF21
	JPH1
	EIF4HP2
	PHF24
	PCGF6
	ARNTL
	DNAAF2
	KLHL3
	CNR1
	MBNL3
	PHF1
	PRR15
	TAB2
	SULT4A1
	MYO1D
	FAM222B
	RHOT1
	RFESD
	TPCN1
	C1QTNF1
	AC022148.1
	FANCG
	SIGLEC16
	PMEPA1
	ELANE
	RUNDC1
	AFF3
	INMT
	FAM189A2
	RWDD4P2
	AQP7P2
	LZTS1
	GBAP1
	SLC24A2
	PIGA
	AC106791.1
	GAPVD1
	COPS3
	AL157700.1
	XRCC4
	POFUT2
	TOGARAM2
	SRRM4
	PPIP5K1
	TCHH
	RABL2B
	PFDN1
	USP38
	AC006007.1
	ADAM22
	C5AR2
	CTSF
	BCL11B
	HAUS5
	AC091230.1
	THBS1
	ISPD
	MPV17
	BIRC7
	EPSTI1
	LRRN3
	EIF2S1
	RMI2
	MANEA
	ZNF844
	GSTM2
	CLEC16A
	RNF125
	AC011498.4
	DHX15
	UNC13B
	PDE7A
	MTMR11
	ANKRD13C
	FANCB
	BEX4
	DCUN1D5
	MYO10
	PMFBP1
[truncated: 6,887 more rows]
