# Supplementary material
Source: publisher site journal article supplement (doi:10.18632/aging.205620)
Supplement: Supplementary file 2 [file aging-v16-205620-supplementary-material-SD3.pdf]

**Supplementary Table 2. Intersection\_of\_related\_diagnosis\_genes.**

| <b>Only LASSO</b> | <b>Only SVM-RFE</b> | <b>LASSO AND SVM-RFE</b>                                                                   |
|-------------------|---------------------|--------------------------------------------------------------------------------------------|
| IFNGR1            | TLR4                | ATG5<br>CASP1<br>CD8A<br>ENTPD1<br>IL10<br>IL17RA<br>IL1R1<br>MYD88<br>NT5E<br>PRF1<br>TNF |
